# Supplementary material
Source: MDPI journal article supplement (https://www.mdpi.com/2073-4441/14/20/3298)
Supplement: s1 [file s1]

## **SUPPLEMENTARY MATERIAL**

# **Agro-Industrial Waste as Potential Heavy Metal Adsorbents and Subsequent Safe Disposal of Spent Adsorbents**

**Daiana Simón <sup>1</sup>, Cristina Palet <sup>2</sup>, Agustín Costas <sup>3</sup>, Adrián Cristóbal <sup>1,\*</sup>**

<sup>1</sup>Instituto de Investigaciones en Ciencia y Tecnología de Materiales (INTEMA), Universidad Nacional de Mar del Plata (UNMdP) - Consejo Nacional de Investigaciones Científicas y Técnicas (CONICET), 7600 Mar del Plata, Argentina; dsimon@fi.mdp.edu.ar

<sup>2</sup>GTS - UAB Research Group, Department of Chemistry, Faculty of Science, Edifici C-Nord, Universitat Autònoma de Barcelona, Carrer dels Til·lers,, 08193 Bellaterra, Spain; cristina.palet@uab.cat

<sup>3</sup>Centro Biotecnológico Fares Taie, 7600 Mar del Plata, Argentina; acostas@farestaie.com.ar

\*Correspondence: acristobal@fi.mdp.edu.ar

## 2. Materials and methods

### 2.3. Biomass characterization

X-ray Diffraction (XRD) (PANalytical X'Pert PRO equipment, with CuK $\alpha$  radiation  $\lambda = 1.5406$  nm and operating conditions 40 kV and 40 mA) where the crystalline phases present were identified with the HighScore Plus software and the International Center for Diffraction Data X-ray powder diffraction pattern database

## 3. Results and Discussion

### 3.1 Biomass characterization

XRD was used to determine the crystallographic structure of the residues used as adsorbents. The diffraction analysis is presented in Figure S1. The biomasses showed the presence of semi-crystalline cellulose as an organic component, with peaks at 16°, 22° and 35° 2 $\theta$ , and low crystallinity due to the presence of amorphous non-cellulosic materials such as lignin and hemicellulose [1]. A peak at 26° 2 $\theta$  in the diffractogram of the corn residues corresponded to the presence of SiO<sub>2</sub>, in a quartz structure, that is part of the mineral fraction of the biomass.

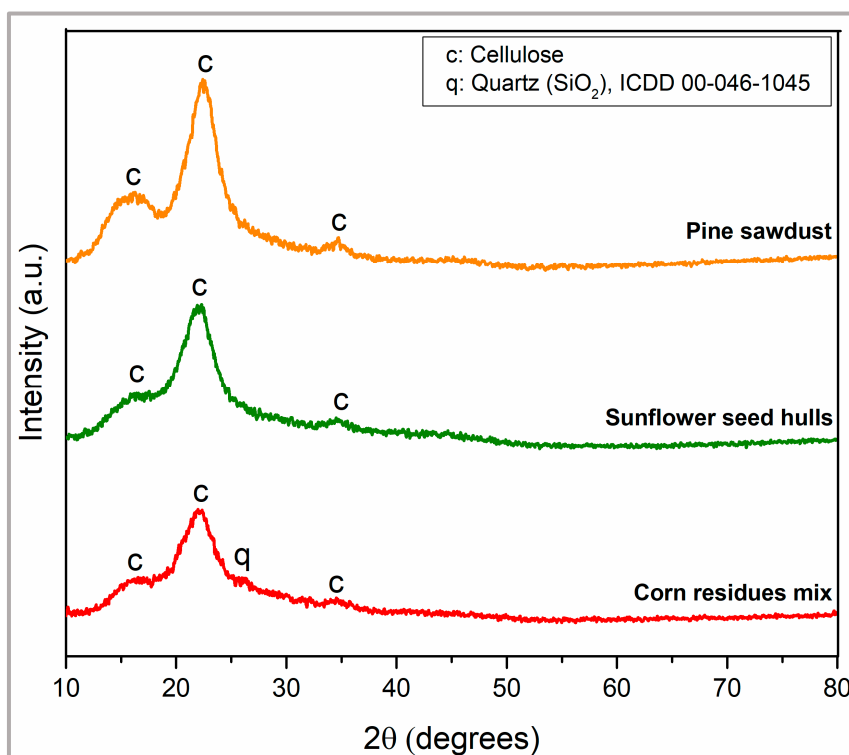

**Figure S1.** XRD patterns of pine sawdust, sunflower seed hulls, and corn residues mix.

### 3.2 Adsorption process characterization

Table S1 compares the obtained adsorption results in this paper with those reported in the literature for Ni(II), Zn(II), and Cd(II) batch adsorption experiments on sawdust, sunflower, and corn residues.

**Table S1.** Main results of literature studies about the adsorption of Ni(II), Zn(II) and Cd(II) on sawdust, sunflower and corn.

| Adsorbent                                           | Heavy metal | A% (%)     | Reference  |
|-----------------------------------------------------|-------------|------------|------------|
| Pine sawdust ( <i>Pinus elliottii</i> )             | Ni(II)      | 54.4 ± 0.3 | This paper |
|                                                     | Zn(II)      | 72.0 ± 0.9 |            |
|                                                     | Cd(II)      | 76.5 ± 0.4 |            |
| Bamboo sawdust ( <i>Gigantochloa scortechinii</i> ) | Zn(II)      | 74.0       | [2]        |
| Poplar wood sawdust                                 | Zn(II)      | 74.0       | [3]        |
| Sawdust ( <i>Picea smithiana</i> )                  | Cd(II)      | 83.3       | [4]        |
| Sunflower seed hulls ( <i>Helianthus annuus</i> )   | Ni(II)      | 71 ± 2     | This paper |
|                                                     | Zn(II)      | 89.2 ± 0.3 |            |
|                                                     | Cd(II)      | 96.6 ± 0.2 |            |
| Sunflower seed husk                                 | Ni(II)      | 84.8       | [5]        |
| Sunflower achene head                               | Cd(II)      | 40.0       | [6]        |
| Sunflower stalk ( <i>Helianthus annuus</i> )        | Cd(II)      | 95.0       | [7]        |
| Corn residues ( <i>Zea mays var. saccharata</i> )   | Ni(II)      | 58.9 ± 0.7 | This paper |
|                                                     | Zn(II)      | 82.8 ± 0.1 |            |
|                                                     | Cd(II)      | 90.7 ± 0.2 |            |
| Corn cob                                            | Ni(II)      | 79.2       | [8]        |
| Corn cob                                            | Cd(II)      | 50.0       | [6]        |
| Corn cob                                            | Cd(II)      | 98.7       | [9]        |

### References

1. Mtibe, A.; Linganis, L.Z.; Mathew, A.P.; Oksman, K.; John, M.J.; Anandjiwala, R.D. A Comparative Study on Properties of Micro and Nanopapers Produced from Cellulose and Cellulose Nanofibres. *Carbohydr. Polym.* **2015**, *118*, 1–8, doi:10.1016/j.carbpol.2014.10.007.
2. Sulaiman, O.; Ghani, N.S.; Rafatullah, M.; Hashim, R.; Ahmad, A. Sorption Equilibrium and Thermodynamic Studies of Zinc (II) Ions from Aqueous Solutions by Bamboo Sawdust. *J. Dispers. Sci. Technol.* **2011**, *32*, 583–590, doi:10.1080/01932691003757322.
3. Demcak, S.; Balintova, M.; Hurakova, M.; Frontasyeva, M. V.; Zinicovscaia, I.; Yushin, N. Utilization of Poplar Wood Sawdust for Heavy Metals Removal from Model Solutions. *Nov. Biotechnol. Chim.* **2017**, *16*, 26–31, doi:10.1515/nbec-2017-0004.
4. Mahmood-Ul-Hassan, M.; Yasin, M.; Yousra, M.; Ahmad, R.; Sarwar, S. Kinetics, Isotherms, and Thermodynamic Studies of Lead, Chromium, and Cadmium Bio-Adsorption from Aqueous Solution onto Picea Smithiana Sawdust. *Environ. Sci. Pollut. Res.* **2018**, *25*, 12570–12578, doi:10.1007/s11356-018-1300-3.
5. Abdulhussein, S.A.; Al wared, A.I. Single and Binary Adsorption of Cu(II) and Ni(II) Ions from Aqueous Solutions by Sunflower Seed Husk. *Assoc. Arab Univ. J. Eng. Sci.* **2019**, *26*, 35–43, doi:10.33261/jaaru.2019.26.1.005.
6. Mahmood-ul-Hassan, M.; Suthor, V.; Rafique, E.; Yasin, M. Removal of Cd, Cr, and Pb from

Aqueous Solution by Unmodified and Modified Agricultural Wastes. *Environ. Monit. Assess.* **2015**, 187, 19, doi:10.1007/s10661-014-4258-8.

7. Jalali, M.; Aboulghazi, F. Sunflower Stalk, an Agricultural Waste, as an Adsorbent for the Removal of Lead and Cadmium from Aqueous Solutions. *J. Mater. Cycles Waste Manag.* **2013**, 15, 548–555, doi:10.1007/s10163-012-0096-3.
8. Saeed, A.A.H.; Harun, N.Y.; Sufian, S.; Bin Aznan, M.F. Effect of Adsorption Parameter on the Removal of Nickel (II) by Low-Cost Adsorbent Extracted from Corn Cob. *Int. J. Adv. Res. Eng. Technol.* **2020**, 11, 981–989, doi:10.34218/IJARET.11.09.2020.096.
9. Melese, T.; Chala, K.; Ayele, Y.; Abdisa, M. Preparation , Characterization of Raw Corncob Adsorbent for Removal of Heavy Metal Ions from Aqueous Solution Using Batch Method. *African J. Pure Appl. Chem.* **2020**, 14, 81–90, doi:10.5897/AJPAC2019.0817.
